# Supplementary material for: Trends in Blood Pressure and Prevalence of Hypertension in Korean Adults Based on the 1998–2014 KNHANES
Source: PubMed Central journal article supplement — Yonsei Med J. 2018 Mar 30;59(3):356–65. doi: 10.3349/ymj.2018.59.3.356 (PMC5889987; doi:10.3349/ymj.2018.59.3.356), 2018-03-30
Supplement: ymj-59-356-s001.pdf [file ymj-59-356-s001.pdf]

**Supplementary Table 1.** Factors Associated with Less-Than-Normotensive or Less-Than-Hypertensive BP in Multivariate Logistic Regression Analysis from KHNANES III to VI Phase

| OR (95% CI)                         | Less-than-normotensive BP | Less-than-hypertensive BP |
|-------------------------------------|---------------------------|---------------------------|
| <b>Men</b>                          |                           |                           |
| Age, every 10 years                 | 0.644 (0.615–0.675)       | 0.751 (0.717–0.787)       |
| BMI, every 1 kg/m <sup>2</sup>      | 0.851 (0.835–0.867)       | 0.877 (0.861–0.894)       |
| FPG, every 1 mg/dL                  | 0.991 (0.988–0.995)       | 0.994 (0.992–0.997)       |
| Total cholesterol, every 1 mg/dL    | 0.997 (0.996–0.999)       | 0.996 (0.995–0.998)       |
| Sufficient activity (yes vs. no)    | 0.981 (0.887–1.085)       | 1.022 (0.918–1.138)       |
| Heavy alcohol-drinking (yes vs. no) | 0.537 (0.471–0.612)       | 0.597 (0.528–0.676)       |
| Current smoking (yes vs. no)        | 1.186 (0.961–1.424)       | 1.087 (0.970–1.218)       |
| Energy intake, every 100 kcal/day   | 1.005 (0.998–1.012)       | 1.001 (0.994–1.008)       |
| Na intake, every 100 mg/day         | 0.999 (0.997–1.001)       | 0.999 (0.998–1.001)       |
| <b>Women</b>                        |                           |                           |
| Age, every 10 years                 | 0.453 (0.431–0.477)       | 0.531 (0.501–0.562)       |
| BMI, every 1 kg/m <sup>2</sup>      | 0.860 (0.845–0.875)       | 0.901 (0.882–0.920)       |
| FPG, every 1 mg/dL                  | 0.991 (0.987–0.996)       | 0.998 (0.995–1.002)       |
| Total cholesterol, every 1 mg/dL    | 0.996 (0.994–0.998)       | 0.994 (0.992–0.996)       |
| Sufficient activity (yes vs. no)    | 1.082 (0.972–1.205)       | 0.920 (0.802–1.055)       |
| Heavy alcohol-drinking (yes vs. no) | 0.445 (0.355–0.558)       | 0.436 (0.328–0.579)       |
| Current smoking (yes vs. no)        | 1.156 (0.897–1.488)       | 1.085 (0.796–1.477)       |
| Energy intake, every 100 kcal/day   | 1.001 (0.992–1.010)       | 0.998 (0.985–1.012)       |
| Na intake, every 100 mg/day         | 1.001 (0.999–1.003)       | 1.000 (0.997–1.002)       |

KHNANES, Korean National Health and Nutrition Examination Survey; BP, blood pressure; BMI, body mass index; FPG, fasting plasma glucose; Na, sodium; OR, odds ratio; CI, confidence interval.

Adjusting for age, BMI, FPG, total cholesterol, sufficient activity, heavy alcohol drinking, smoking status, energy intake, sodium intake, medication and anti-dyslipidemic medication.
